# Supplementary material
Source: MDPI journal article supplement (https://www.mdpi.com/2073-4441/13/11/1545)
Supplement: s1 [file s1 › water-1239206-supplementary.pdf]

## Supplementary material for

# Identifying microbial distribution drivers of archaeal community in sediments from a black-odorous urban river – a case study of the Zhang River basin

Chao Shen <sup>1</sup> <sup>2</sup>, Jiaqi Zhao <sup>3</sup>, Guangwu Xie <sup>1</sup>, Yulai Wang <sup>1\*</sup>, Qiang Chen <sup>1</sup> and Yu Yao<sup>4\*</sup>

1 Chengdu Engineering Corporation Limited, Power China, Chengdu 610072, China

2 Urban Water Environment Treatment Engineering Technology Research Center of Sichuan Province

3 College of Environment, Hohai University, Nanjing 210098, China

4 School of Environment, Nanjing Normal University, Nanjing 210023, China

\* Correspondence: [2017007@chidi.com.cn](mailto:2017007@chidi.com.cn) (Y. W); [yaoyu@njnu.edu.cn](mailto:yaoyu@njnu.edu.cn) (Y. Y)

**Citation:** Shen, C.; Zhao, J.; Xie, G.;

Wang, Y.; Chen, Q.; Yao, Y.

Identifying microbial distribution drivers of archaeal community in sediments from a blacken and odorous urban river. *Water* **2021**, *13*, x. <https://doi.org/10.3390/xxxxx>

Received: date

Accepted: date

Published: date

**Publisher's Note:** MDPI stays neutral with regard to jurisdictional claims in published maps and institutional affiliations.

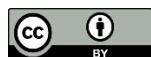

**Copyright:** © 2021 by the authors.

Submitted for possible open access publication under the terms and conditions of the Creative Commons Attribution (CC BY) license (<http://creativecommons.org/licenses/by/4.0/>).

Table S1. The Good's coverage of the archaeal community from the eight sediment samples. The result are presented as mean  $\pm$  standard deviation (SD)

| Samples | The Good's coverage value |
|---------|---------------------------|
| A       | 99.61% $\pm$ 0.06%        |
| B       | 99.21% $\pm$ 0.06%        |
| C       | 99.60% $\pm$ 0.05%        |
| D       | 99.29% $\pm$ 0.11%        |
| E       | 99.32% $\pm$ 0.07%        |
| F       | 99.34% $\pm$ 0.07%        |
| G       | 99.21% $\pm$ 0.12%        |
| H       | 99.20% $\pm$ 0.18%        |

Table S2. VIF value for selected environmental factors

| Physicochemical factor | VIF Value | Physicochemical factor | VIF Value |
|------------------------|-----------|------------------------|-----------|
| TP                     | 2.89      | Zn                     | 2.00      |
| Eh                     | 1.41      | As                     | 1.37      |
| pH                     | 2.74      | Cd                     | 4.71      |
| Cr                     | 2.41      | Pb                     | 4.48      |
| Cu                     | 3.82      |                        |           |

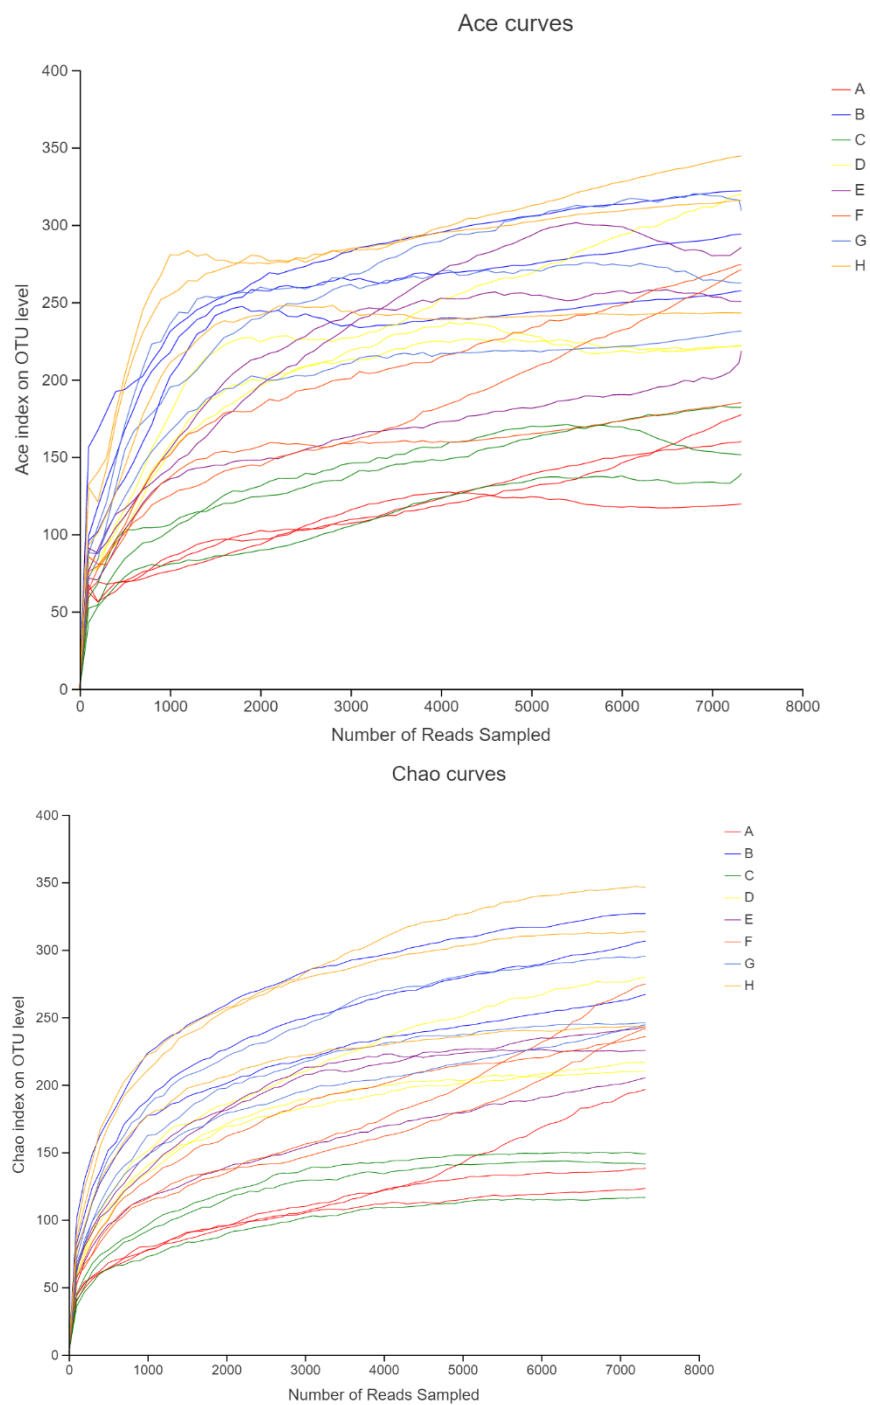

Figure S1. The rarefaction curves for ACE and Chao1 index of the archaeal community from the eight sediment samples.
